# Supplementary material for: Oxygen vacancies in Bi2WO6 enable robust nitrate reduction reaction catalysis
Source: Royal Society of Chemistry journal article supplement (doi:10.1039/d4cc04193c), 2024-01-01
Supplement: d4cc04193c1.pdf [file d4cc04193c1.pdf]

## Supporting information

for

### **Oxygen vacancy in $\text{Bi}_2\text{WO}_6$ enables a robust nitrate reduction reaction catalysis**

Qing Ren<sup>a</sup>, Cong Zhou<sup>b,c</sup>, Yumei Feng<sup>c</sup>, Yifei Li<sup>d</sup>, Yuhua Xie<sup>e</sup>, Yingjie Yu<sup>b</sup>,  
Chunsheng Li<sup>e,f</sup>, Yazhou Chen<sup>b\*</sup>, Yan Sun<sup>e,f\*</sup> and Fang Luo<sup>b\*</sup>

<sup>a</sup>College of Chemical and Textile Engineering, Xinjiang University of Science and Technology, Korla 841000, Xinjiang, China.

<sup>b</sup>State Key Laboratory of New Textile Materials & Advanced Processing Technology, College of Materials Science and Engineering, Wuhan Textile University, 430200, China.

<sup>c</sup>Faculty of Materials Science and Chemistry, China University of Geosciences Wuhan, 388 Lumo RD, Wuhan, 430074, China.

<sup>d</sup>School of Engineering, Huzhou University, Huzhou, 313000, China

<sup>e</sup>School of Chemistry and Life Sciences, Suzhou University of Science and Technology, Suzhou City, Jiangsu Province 215009, China.

<sup>f</sup>Key Laboratory of Advanced Electrode Materials for Novel Solar Cells for Petroleum and Chemical Industry of China, Suzhou University of Science and Technology, Suzhou City, Jiangsu Province 215009, China.

## **Experimental section**

**Preparation of Bi<sub>2</sub>WO<sub>6</sub>:** First, dissolve 122.5 mg of Bi(NO<sub>3</sub>)<sub>3</sub>·5H<sub>2</sub>O in 10 mL of ultrapure (UP) water, and 83 mg of Na<sub>2</sub>WO<sub>4</sub> in 20 mL of UP water. Once both solutions are fully dissolved, mix them together. Adjust the pH to a range of 5-7, transfer the mixture into a 50 mL PTFE-lined container, and heat it hydrothermally at 160 °C for 14 hours. After the reaction, centrifuge using a 50 mL centrifuge tube, and wash the precipitate multiple times with UP water and anhydrous ethanol to obtain Bi<sub>2</sub>WO<sub>6</sub>.

**Preparation of Bi<sub>2</sub>O<sub>3</sub>:** Disperse 0.25 g of Bi(NO<sub>3</sub>)<sub>3</sub>·5H<sub>2</sub>O in 30 mL of UP water. Gradually add 10 mL of 0.5 M NaOH while stirring at 500 rpm for 0.5-2 minutes. Transfer the mixture to a reaction vessel and conduct hydrothermal treatment at 160 °C for 14 hours. After the reaction, collect the product by centrifugation and wash it repeatedly with UP water and anhydrous ethanol to get Bi<sub>2</sub>O<sub>3</sub>.

**Preparation of WO<sub>3</sub>:** Disperse 0.33 g of Na<sub>2</sub>WO<sub>4</sub> in 40 mL of UP water. Slowly add 8 mL of concentrated hydrochloric acid while stirring at 500 rpm for 0.5-2 minutes. Transfer the mixture to a reaction vessel and conduct hydrothermal treatment at 160 °C for 14 hours. After the reaction, collect the product by centrifugation and wash it repeatedly with UP water and anhydrous ethanol to get WO<sub>3</sub>.

**Material Characterization:** The crystal structure and physical phases of the as-prepared electrocatalysts were examined using X-ray diffraction spectroscopy (XRD, D8 Advance) with Cu K $\alpha$  radiation over a range of 5-90°. The morphologies and microstructures were observed using a Field Emission Scanning Electron Microscope

(FE-SEM, FEI, SU8010) and Transmission Electron Microscopy (TEM, FEI Talos F200x G2). X-ray photoelectron spectroscopy (XPS, ESCALAB 250Xi) with non-monochromatized Al-K $\alpha$  X-ray as the excitation source was employed to determine the surface chemical states and electronic structure. The recorded binding energy was corrected by referencing the C 1s peak at 284.6 eV, and peak fitting was performed using the Shirley background and XPSPEAK41 software.

**Electrochemical measurement:** The electrochemical performance of all catalyst materials is tested using a Gamry electrochemical workstation under ambient conditions in an H-type electrolytic cell. A pre-treated Nafion 212 membrane is used to separate the anode and cathode chambers. A three-electrode system is used for the tests, with a glassy carbon electrode (d=3 mm) modified with the catalyst material as the working electrode, a carbon rod as the counter electrode, and a saturated calomel electrode (SCE) as the reference electrode. A 200 ppm KNO<sub>3</sub> and pH=1 H<sub>2</sub>SO<sub>4</sub> solution is used as the electrolyte. The performance of the modified electrode for electrocatalytic ammonia synthesis is tested at room temperature. Before the tests, argon is bubbled for half an hour to remove dissolved impurity gases from the electrolyte. Various electrochemical methods such as Linear Sweep Voltammetry (LSV), Cyclic Voltammetry (CV), Electrochemical Impedance Spectroscopy (EIS), and Chronoamperometry (CA) are employed to evaluate the catalyst's basic electrochemical performance. LSV tests are conducted in the voltage range of 0.2 to -0.6 V vs. RHE, with a scan rate of 5 mV s<sup>-1</sup>. CA tests for double-layer capacitance are performed in the voltage range of 0.16 to 0.26 V vs. RHE, with scan rates of 10, 20, ...

100 mV s<sup>-1</sup>. EIS tests the impedance of the catalyst with an open-circuit voltage of -0.4 V vs. RHE and a frequency range of 10<sup>5</sup> to 10<sup>-2</sup> Hz. During CA testing, the voltage is set at the value where 10 mA cm<sup>-2</sup> current density is reached during LSV testing, and the duration is set to 2 hours. After the reaction, the product is collected for further concentration determination.

***in-situ* Raman Testing:** To elucidate the reaction mechanism of nitrate reduction to ammonia on Bi<sub>2</sub>WO<sub>6</sub>, Raman spectra analysis is performed using a WITec alpha-300R instrument with a 532 nm excitation wavelength laser at 9 mW laser intensity, and a spectral scan rate of once every 6 seconds. To minimize testing errors, the exposure time is set to 6 seconds and results are accumulated 5 times. Single crystal silicon is used to calibrate the Raman frequency for each experiment. An electrochemical workstation (Gamry Interface) is used to control the potential. Catalyst ink is dropped onto the glassy carbon electrode as the working electrode, with the sample plane kept perpendicular to the incident laser. Platinum wire and an Ag/AgCl electrode (saturated KCl) are used as the counter and reference electrodes, respectively, with a mixed solution of 0.05 M H<sub>2</sub>SO<sub>4</sub> and 200 ppm KNO<sub>3</sub> as the electrolyte.

**Table S1** Comparisons of NitrRR performance of Bi<sub>2</sub>WO<sub>6</sub> with recently reported electrocatalysts.

| Electrocatalyst                                  | Potential (V vs. RHE) | FE (%) | Ref.      |
|--------------------------------------------------|-----------------------|--------|-----------|
| Bi <sub>2</sub> WO <sub>6</sub>                  | -0.3 V                | 62%    | this work |
| BiNCs                                            | -0.6 V                | 66%    | [1]       |
| FC                                               | -0.65 V               | 20%    | [2]       |
| MO <sub>2</sub> CT <sub>x</sub>                  | -0.4 V                | 41%    | [3]       |
| Ni/NCNS                                          | -0.52 V               | 77.8%  | [4]       |
| Co <sub>3</sub> O <sub>4</sub> @MoS <sub>2</sub> | -0.64 V               | 52.7%  | [5]       |
| NDC-800                                          | -1.4 V                | 17.8%  | [6]       |
| Cu <sub>0.43</sub> Ni <sub>0.57</sub> /NC        | -1.3 V                | 50%    | [7]       |
| Fe(20%)@N-C                                      | -1.0                  | 25%    | [8]       |
| re-Cu NRs                                        | -1.0 V                | 44.3%  | [9]       |

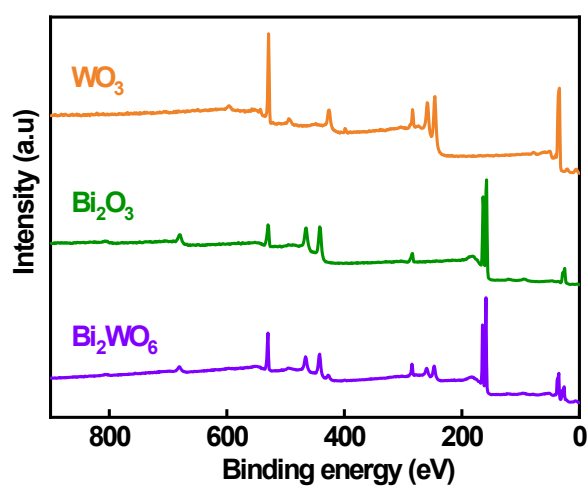

**Figure S1** XPS survey scan of Bi<sub>2</sub>O<sub>3</sub>, WO<sub>3</sub> and Bi<sub>2</sub>WO<sub>6</sub>.

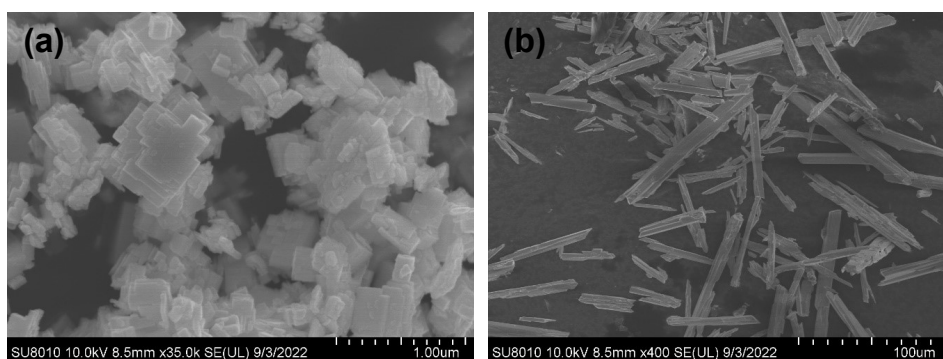

**Figure S2** SEM images of WO<sub>3</sub> (a) and Bi<sub>2</sub>O<sub>3</sub> (b).

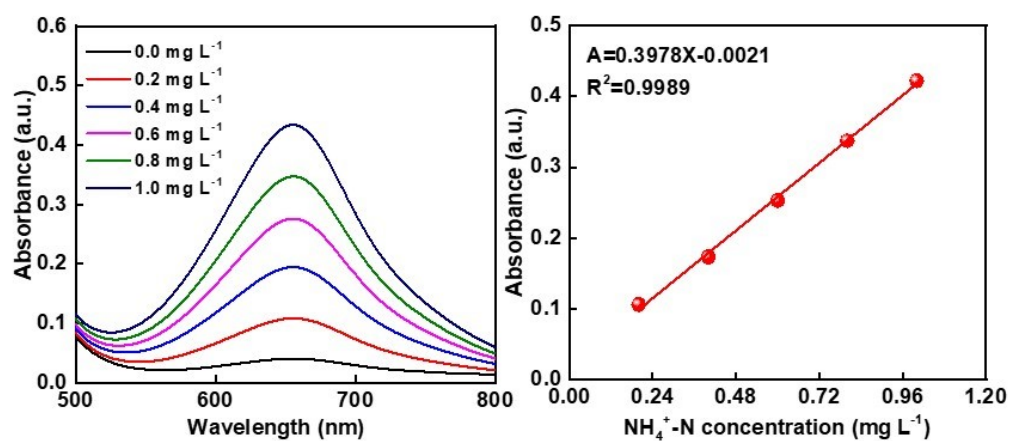

**Figure S3** (a) UV-vis spectroscopies of standard NH<sub>4</sub><sup>+</sup> concentrations. (b) Plots of intensity vs. NH<sub>4</sub><sup>+</sup> concentration.

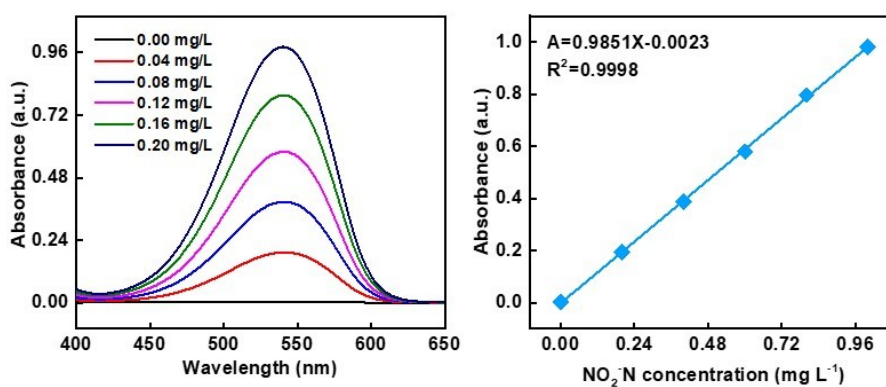

**Figure S4** (a) UV-vis spectroscopies of standard NO<sub>2</sub><sup>-</sup> concentrations. (b) Plots of intensity vs. NO<sub>2</sub><sup>-</sup> concentration.

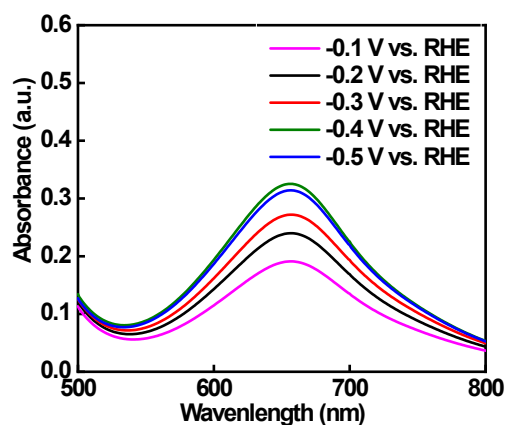

**Figure S5** UV-vis spectroscopies from 500-800 nm of electrolytes after 2 h long term electrocatalysis by  $\text{Bi}_2\text{WO}_6$  under various potentials.

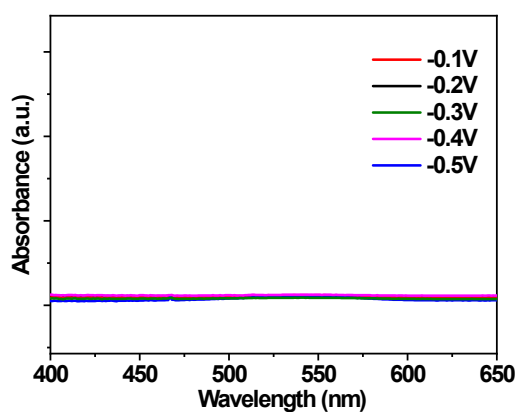

**Figure S6** UV-vis spectroscopies from 400-650 nm of electrolytes after 2 h long term electrocatalysis by  $\text{Bi}_2\text{WO}_6$  under various potentials.

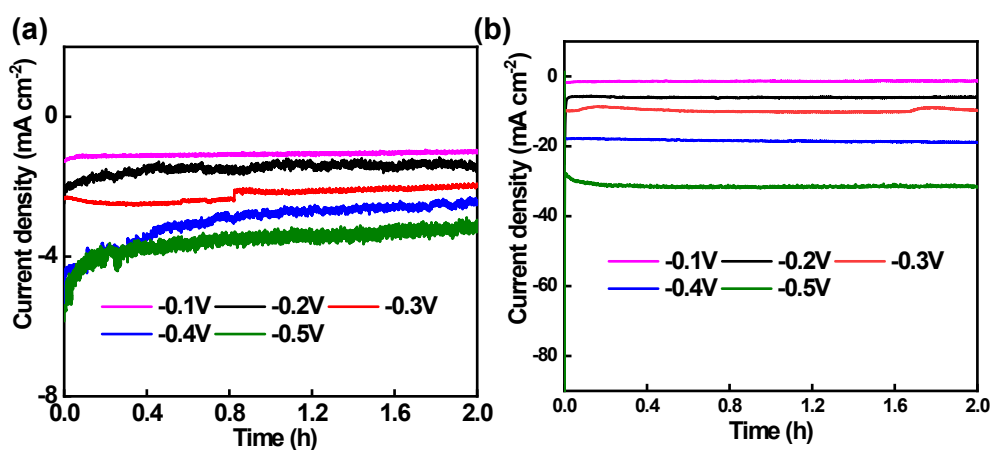

**Figure S7** i-t tests of  $\text{Bi}_2\text{O}_3$  (a) and  $\text{WO}_3$  (b).

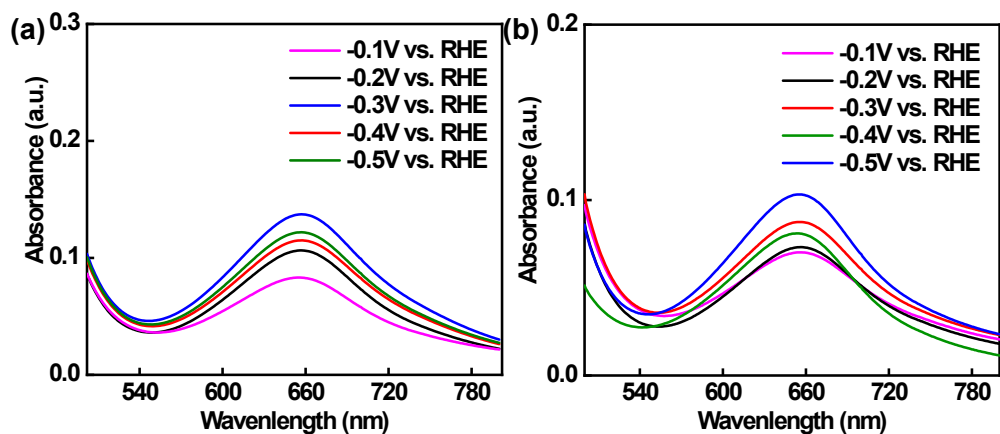

**Figure S8** UV-vis spectroscopies of  $\text{Bi}_2\text{O}_3$  (a) and  $\text{WO}_3$  (b) under various potentials.

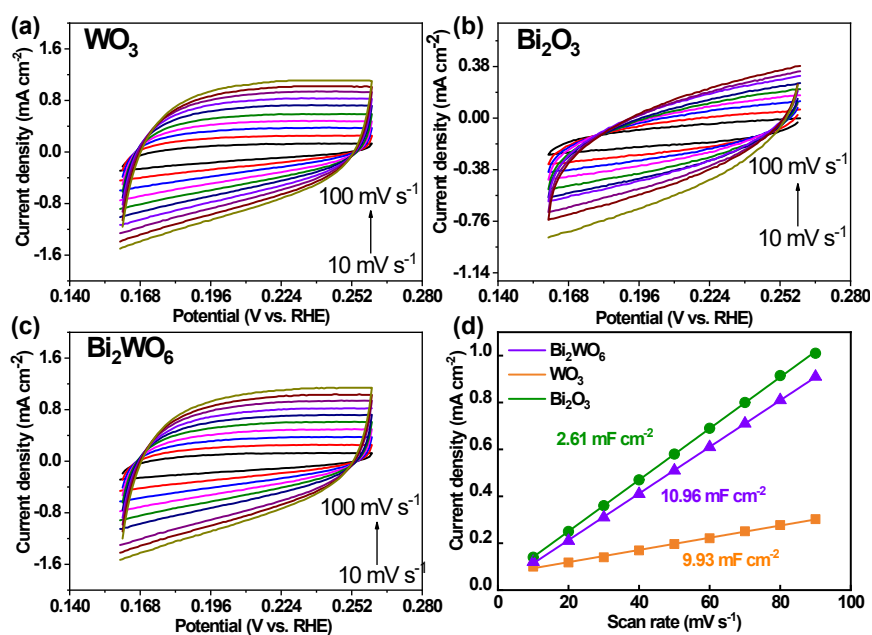

**Figure S9** Cyclic voltammetry curves of  $\text{WO}_3$  (a),  $\text{Bi}_2\text{O}_3$  (b) and  $\text{Bi}_2\text{WO}_6$  (c) at various scan rates. (d)  $C_{dl}$  of  $\text{WO}_3$ ,  $\text{Bi}_2\text{O}_3$  and  $\text{Bi}_2\text{WO}_6$ .



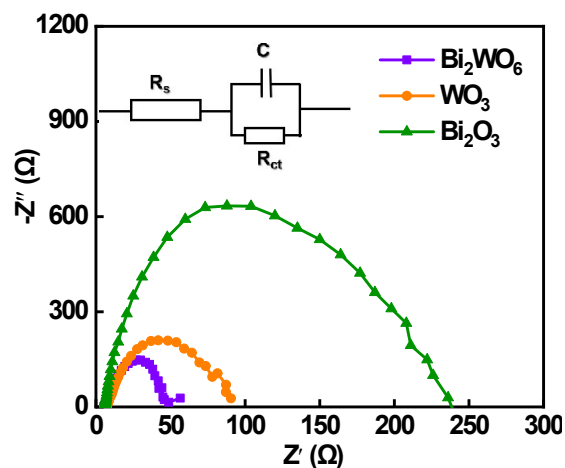

**Figure S10** Electrochemical impedance spectroscopies of  $\text{Bi}_2\text{O}_3$ ,  $\text{WO}_3$  and  $\text{Bi}_2\text{WO}_6$ .

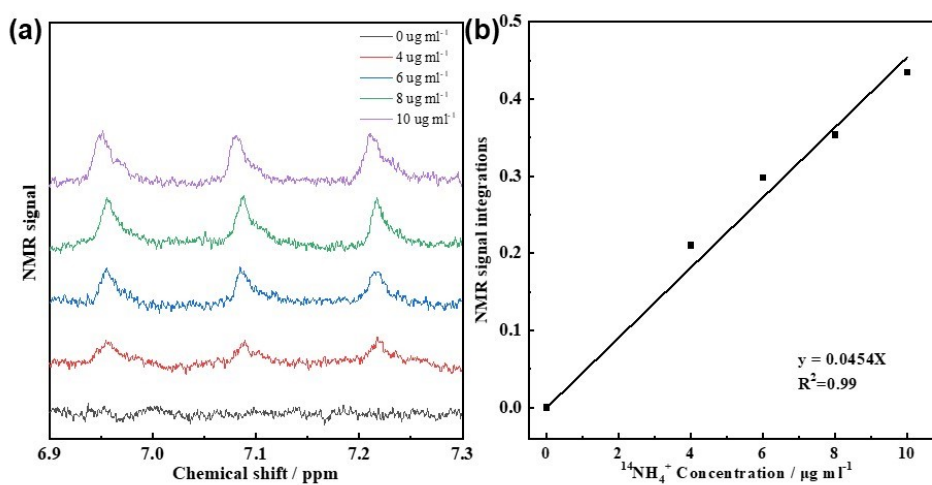

**Figure S11** NMR spectra of standard  $\text{NH}_4^+$  concentrations. (b) Plots of intensity vs.  $\text{NH}_4^+$  concentration.

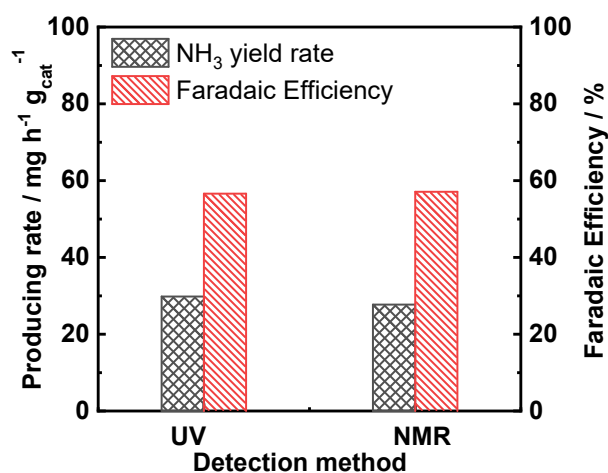

**Figure S12** Comparison of ammonia Faradaic efficiency and yielding rate calculated from UV and NMR methods.

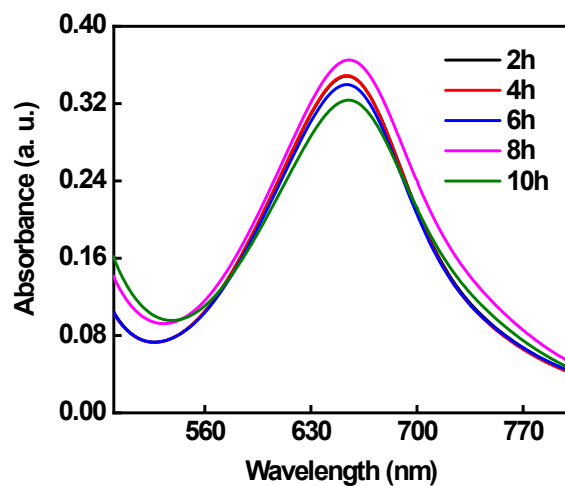

**Figure S13** UV-vis spectroscopies of  $\text{Bi}_2\text{WO}_6$  after long term electrocatalysis.

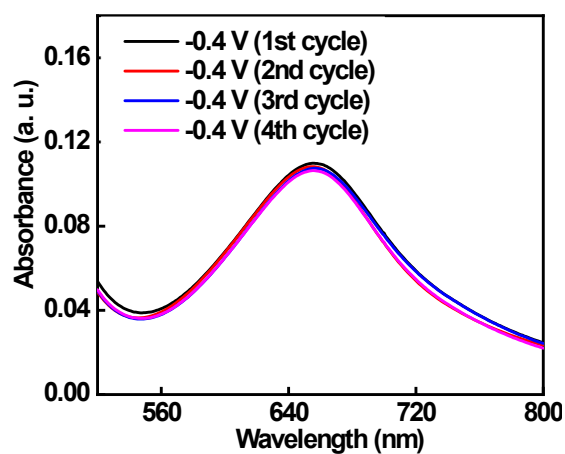

**Figure S14** UV-vis spectroscopies of  $\text{Bi}_2\text{WO}_6$  tested 4 times.

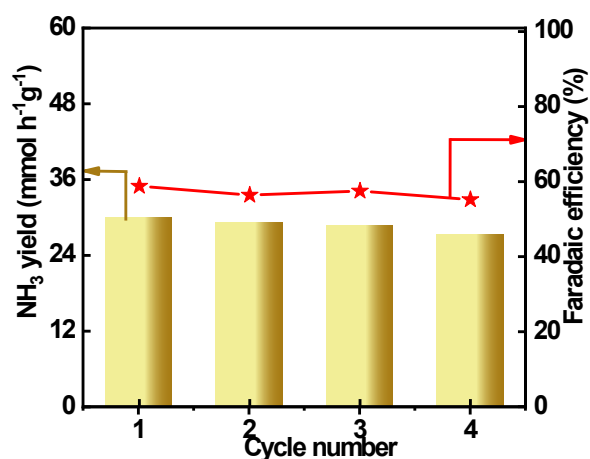

**Figure S15** Faradaic efficiency and ammonia yielding rate of  $\text{Bi}_2\text{WO}_6$  tested 4 times.

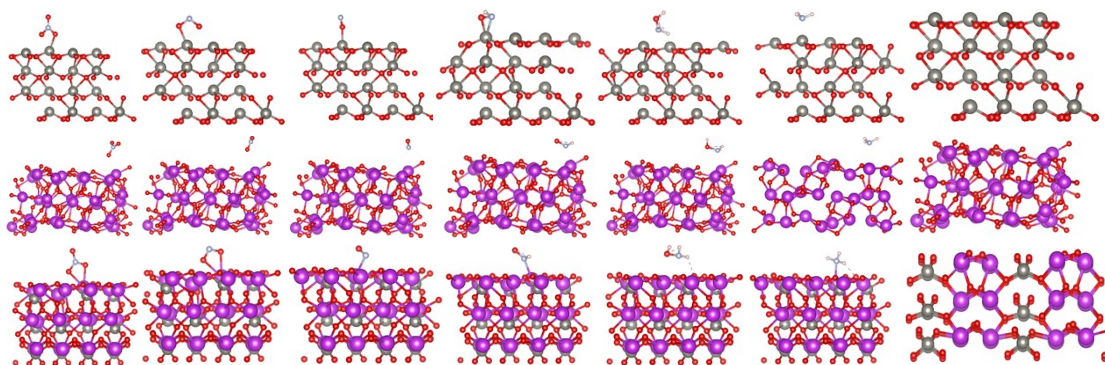

**Figure S16** Reaction intermediates on  $\text{WO}_3$ ,  $\text{Bi}_2\text{O}_3$  and  $\text{Bi}_2\text{WO}_6$ .

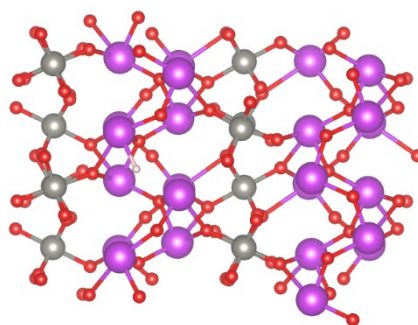

**Figure S17** Chemical structure of hydrogen atom on  $\text{Bi}_2\text{WO}_6$ .

## References

- [1] Y.-C. Hao, Y. Guo, L.-W. Chen, M. Shu, X.-Y. Wang, T.-A. Bu, W.-Y. Gao, N. Zhang, X. Su, X. Feng, J.-W. Zhou, B. Wang, C.-W. Hu, A.-X. Yin, R. Si, Y.-W. Zhang, C.-H. Yan, *Nat. Catal.* 2019, 2, 448-456.
- [2] Y. Li, S. Xiao, X. Li, C. Chang, M. Xie, J. Xu, Z. Yang, *Materials Today Physics* 2021, 19, 100431.
- [3] D. F. Abbott, Y.-Z. Xu, D. A. Kuznetsov, P. Kumar, C. R. Müller, A. Fedorov, V. Mougel, *Angew. Chem. Int. Ed.* 2023, 62, e202313746.
- [4] C. Ye, Z. Guo, Y. Zhou, Y. Shen, *J. Colloid Interface Sci.* 2025, 677, 933-941.
- [5] Y. Zhang, J. Xiong, S. Yan, B. Liu, *J. Electroanal. Chem.* 2023, 946, 117702.
- [6] Z. Chen, J. Chen, G. Barcaro, T. M. Budnyak, A. Rokicińska, R. Dronskowski, S. Budnyk, P. Kuśtrowski, S. Monti, A. Slabon, *Catal. Sci. Technol.* 2022, 12, 3582-3593.
- [7] L. Fang, S. Wang, C. Song, X. Yang, Y. Li, H. Liu, *J. Hazard. Mater.* 2022, 421, 126628.
- [8] W. Duan, G. Li, Z. Lei, T. Zhu, Y. Xue, C. Wei, C. Feng, *Water Res.* 2019, 161, 126-135.
- [9] Y. Zhu, K. Wen, X. Wan, G. Dong, J. Niu, *Chin. Chem. Lett.* 2024, 110399.
